# Supplementary material for: CpG Island Methylation in Sessile Serrated Adenoma/Polyp of the Colorectum: Implications for Differential Diagnosis of Molecularly High-Risk Lesions among Non-dysplastic Sessile Serrated Adenomas/Polyps
Source: PubMed Central journal article supplement — J Pathol Transl Med. 2019 Mar 19;53(4):225–35. doi: 10.4132/jptm.2019.03.12 (PMC6639709; doi:10.4132/jptm.2019.03.12), 2019-03-19
Supplement: jptm-2019-03-12-suppl4.pdf [file jptm-2019-03-12-suppl4.pdf]

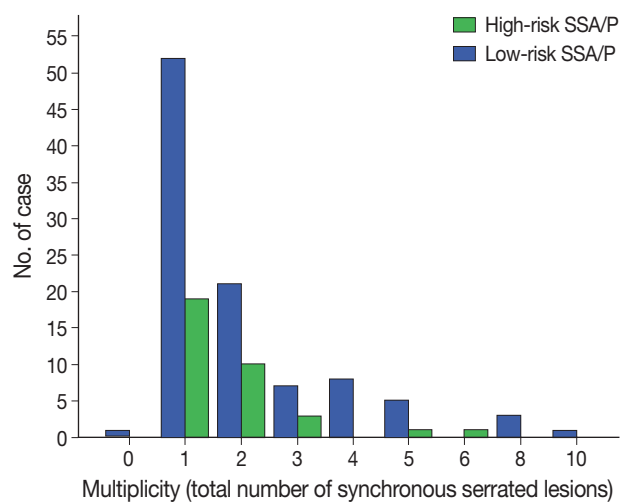

**Supplementary Fig. S3.** Frequencies of high-risk versus low-risk subgroups of 132 non-dysplastic sessile serrated adenomas/polyps (SSA/Ps), according to the multiplicity of serrated lesions (total number of synchronous serrated lesions).
